# Supplementary material
Source: Research Square preprint supplement (doi:10.21203/rs.3.rs-9300091/v1)

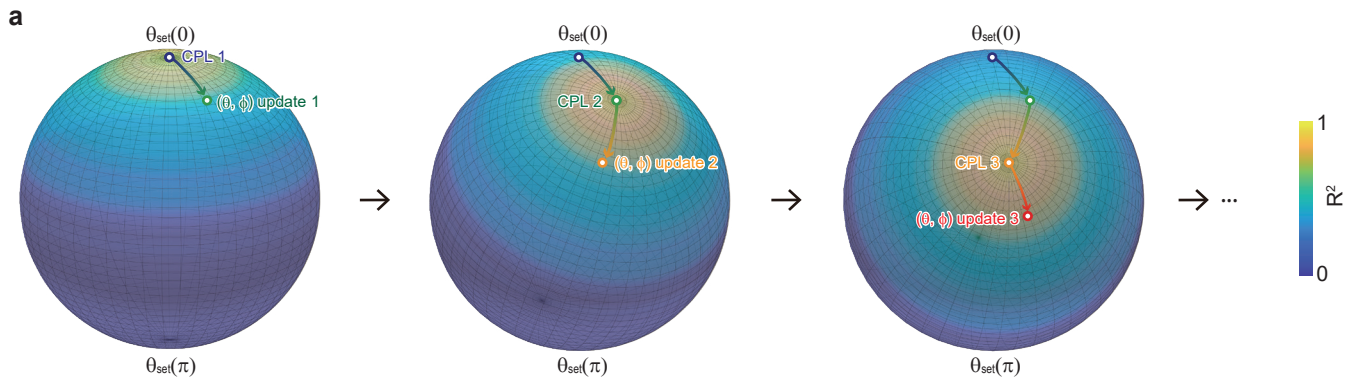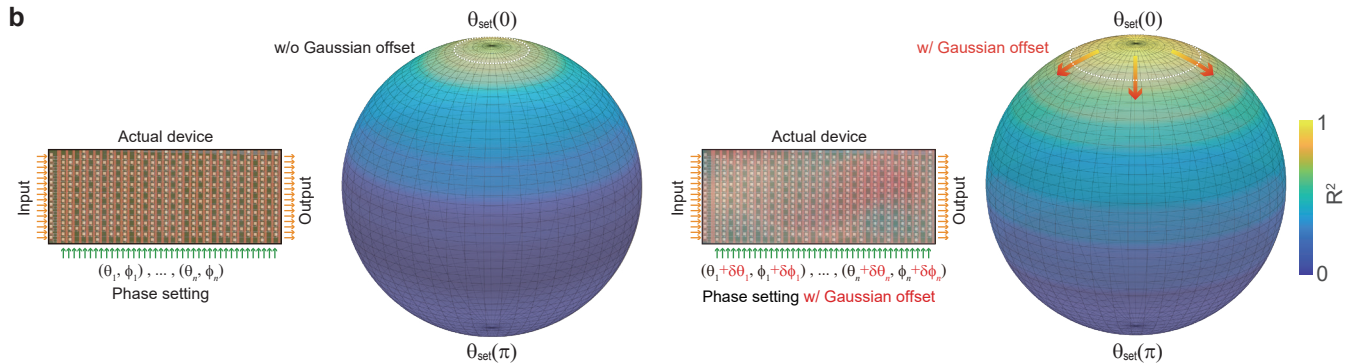

Supplement: Supplementary file 1 [file 48bfd372278fc6135feafb48.pdf]
